# Supplementary material
Source: ML conference proceedings conference paper supplement (https://proceedings.mlr.press/v108/wang20i.html)
Supplement: Supplementary file 2 [file wang20i-supp.zip]

# SUPPLEMENTARY MATERIAL OF “CAUSAL INFERENCE IN DEGENERATE SYSTEMS: AN IMPOSSIBILITY RESULT”

**S.1. Proof of Lemma 1.** We first present a proposition based on the weak union property of probability distributions (Pearl, 1988).

**Proposition S1.** *Any superset of a Markov blanket is still a Markov blanket.*

Now consider two Markov boundaries  $\mathcal{M}_1, \mathcal{M}_2$  within  $\{X\} \cup \mathcal{K}$ . Let  $\mathcal{M}_1 = \{X\} \cup \mathcal{Z}^1, X \notin \mathcal{M}_2, \mathcal{M}_2 \setminus \mathcal{M}_1 = \mathcal{Z}^2, \mathcal{K} \cup \{X\} \setminus (\mathcal{M}_1 \cup \mathcal{M}_2) = \mathcal{Z}^3$ , where  $\mathcal{Z}^1 = \{Z_1, \dots, Z_n\}, \mathcal{Z}^2 = \{Z'_1, \dots, Z'_m\}, \mathcal{Z}^3 = \{Z''_1, \dots, Z''_l\}$ . Therefore  $\mathcal{K} = \mathcal{Z}^1 \cup \mathcal{Z}^2 \cup \mathcal{Z}^3$ .

Fix  $z_0^1 \in \mathbb{Z}^1$  such that  $f(z_0^1) > 0$ . Assume that for  $x_i \in \mathbb{X}, f(x_i, z_0^1) > 0$  is true for  $i \in \{1, \dots, p\}$ . Assume that for  $z_j^2 \in \mathbb{Z}^2, f(z_0^1, z_j^2) > 0$  is true for  $j \in \{1, \dots, q\}$ . Consider any  $y \in \mathbb{Y}$ .

To obtain contradiction, we assume that  $f(x_i, z_0^1, z_j^2) > 0$  for all  $i \in \{1, \dots, p\}$  and all  $j \in \{1, \dots, q\}$ .

Since  $X \perp\!\!\!\perp Y \mid (\mathcal{Z}^1, \mathcal{Z}^2)$  (Proposition S1) for all  $i, r \in \{1, \dots, p\}$  and all  $j \in \{1, \dots, q\}$ ,

$$f(y \mid x_i, z_0^1, z_j^2) = f(y \mid x_r, z_0^1, z_j^2).$$

Since  $\mathcal{Z}^2 \perp\!\!\!\perp Y \mid (X, \mathcal{Z}^1)$  for all  $r \in \{1, \dots, p\}$  and all  $j, s \in \{1, \dots, q\}$ ,

$$f(y \mid x_r, z_0^1, z_j^2) = f(y \mid x_r, z_0^1, z_s^2).$$

All the conditions have positive probabilities, so the conditional probabilities are well-defined.

Then we have

$$f(y \mid x_i, z_0^1, z_j^2) = f(y \mid x_r, z_0^1, z_s^2),$$

for all  $i, r \in \{1, \dots, p\}$  and all  $j, s \in \{1, \dots, q\}$ .

Since this is true for any possible values of  $X$  and  $\mathcal{Z}^2$  when  $\mathcal{Z}^1 = z_0^1$ , we know that

$$f(y \mid x_i, z_0^1, z_j^2) = f(y \mid z_0^1).$$

Therefore, for all  $z_1^1 \in \mathcal{Z}^1$  with  $f(z_1^1) > 0$ , all  $y \in \mathbb{Y}$  and all  $i, j$ ,

$$f(x_i, z_j^2, y \mid z_1^1) = f(x_i, z_j^2 \mid z_1^1) f(y \mid z_1^1)$$

is valid.

This implies that  $(X, \mathcal{Z}^2) \perp\!\!\!\perp Y \mid \mathcal{Z}^1$ , therefore  $X \perp\!\!\!\perp Y \mid \mathcal{Z}^1$ ,  $\text{MI}(Y, \mathcal{Z}^1) = \text{MI}(Y, (X, \mathcal{Z}^1))$ . Since  $\mathcal{M}_1 = \{X\} \cup \mathcal{Z}^1$ ,  $\text{MI}(Y, (X, \mathcal{Z}^1)) = \text{MI}(Y, \mathcal{K})$ . Thus  $\text{MI}(Y, \mathcal{Z}^1) = \text{MI}(Y, \{X\} \cup \mathcal{K})$ , implying that  $\mathcal{Z}^1$  is a Markov blanket, which is a contradiction. So there exists  $x \in \mathbb{X}, z_0^1 \in \mathbb{Z}^1, z_1^2 \in \mathbb{Z}^2$  such that  $f(x, z_0^1) > 0$

(implies  $f(x) > 0$ ),  $f(z_0^1, z_1^2) > 0$ , but  $f(x, z_0^1, z_1^2) = 0$ . Choose  $z_1^3 \in \mathbb{Z}^3$  such that  $f(z_0^1, z_1^2, z_1^3) > 0$ , and let  $k = (z_0^1, z_1^2, z_1^3)$ , then  $f(x) > 0$ ,  $f(k) > 0$ , but  $f(x, k) = 0$ .

**S.2. Proof of Proposition 2.** In this setting, when  $n$  is much larger than fixed  $m$ , due to the property of Dirichlet distribution, with probability at least  $1 - \delta/2$ , we can modify  $\mathbf{p}$  to  $\bar{\mathbf{p}}$  such that three pre-chosen variables  $X, Y, Z$  are independent under  $\bar{\mathbf{p}}$ , and  $d(\mathbf{p}, \bar{\mathbf{p}}) < \epsilon/2$ . Then construct  $\bar{X}, \bar{Y}, \bar{Z}$ :  $\bar{X}, \bar{Y}, \bar{Z}$  equal  $X, Y, Z$  if none of  $X, Y, Z$  is 1;  $\bar{X}, \bar{Y}, \bar{Z}$  equal 1 if at least one of  $X, Y, Z$  is 1. Now either all  $\bar{X}, \bar{Y}, \bar{Z}$  equal 1, or none of them equals 1 (they are independent in this case). Substitute  $X, Y, Z$  by  $\bar{X}, \bar{Y}, \bar{Z}$  to obtain a new distribution  $\mathbf{p}'$ . When  $m$  is large enough,  $d(\mathbf{p}', \bar{\mathbf{p}}) < \epsilon/2$ . Now under  $\mathbf{p}'$ ,  $\bar{X}$  and  $\bar{Z}$  contain exactly the same unique information of  $\bar{Y}$ , thus there exist multiple Markov boundaries. Besides,  $d(\mathbf{p}, \mathbf{p}') < \epsilon/2$ .

**S.3. Proof of Lemma 2.** In the following we will assume there is only one pair of  $(x, l)$  such that  $f(x) > 0$ ,  $f(l) > 0$ ,  $f(x, l) = 0$ . If there are multiple pairs, we can treat them one by one.

We construct a family of probability distributions  $\mathbf{p}_i^\eta$  with mass functions  $f_i^\eta$  based on  $\mathbf{p}$ . For  $(x', l') \neq (x, l)$ ,  $f_i^\eta(x', y, l') = (1 - \eta)f(x', y, l')$ .  $f_i^\eta(x, l) = \eta > 0$ ,  $f_i^\eta(y_j | x, l) = \alpha_i^j$ , where  $\alpha_i^j \geq 0$ ,  $\sum_j \alpha_i^j = 1$ . Then for each  $i$ ,  $\text{CS}[\mathbf{p}_i^\eta](X \rightarrow Y)$  can be defined, and when  $\eta \rightarrow 0$ ,  $f_i^\eta$  converges to  $f$ . The total variation distance between  $f$  and  $f_i^\eta$  is  $\eta$ .

When  $\eta \rightarrow 0$ ,

$$\begin{aligned} \text{CS}[\mathbf{p}_i^\eta](X \rightarrow Y) &= \sum_{x' \in \mathbb{X}} \sum_{y' \in \mathbb{Y}} \sum_{l' \neq l} f_i^\eta(x', y', l') \log \frac{f_i^\eta(y' | x', l')}{\sum_{x'' \in \mathbb{X}} f_i^\eta(y' | x'', l') f_i^\eta(x'')} \\ &\quad + \sum_{x' \in \mathbb{X}} \sum_{y' \in \mathbb{Y}} f_i^\eta(x', y', l) \log \frac{f_i^\eta(y' | x', l)}{\sum_{x'' \in \mathbb{X}} f_i^\eta(y' | x'', l) f_i^\eta(x'')} \\ &\rightarrow \sum_{x' \in \mathbb{X}} \sum_{y' \in \mathbb{Y}} \sum_{l' \neq l} f(x', y', l') \log \frac{f(y' | x', l')}{\sum_{x'' \in \mathbb{X}} f(y' | x'', l') f(x'')} \\ &\quad + \sum_{x' \neq x} \sum_{y' \in \mathbb{Y}} f(x', y', l) \log f(y' | x', l) \\ &\quad - \sum_j f(y_j, l) \log \{f(x) \alpha_i^j + \sum_{x' \neq x} f(x') f(y_j | x', l)\}. \end{aligned}$$

For different  $i$ , when we let  $\eta \rightarrow 0$ , the only different terms are

$$- \sum_j f(y_j, l) \log \{f(x) \alpha_i^j + \sum_{x' \neq x} f(x') f(y_j | x', l)\}.$$

We will show that the above term is not a constant with  $\{\alpha_i^j\}$ . Therefore we can find two groups of  $\{\alpha_i^j\}$  for  $i = 1, 2$  such that  $g_1 = \lim_{\eta \rightarrow 0} \text{CS}[\mathbf{p}_1^\eta](X \rightarrow Y) < \lim_{\eta \rightarrow 0} \text{CS}[\mathbf{p}_2^\eta](X \rightarrow Y) = g_2$ .

If there is only one  $y_1$  such that  $f(y_1, l) > 0$ , then

$$\begin{aligned} & - \sum_j f(y_j, l) \log\{f(x)\alpha_i^j + \sum_{x' \neq x} f(x')f(y_j | x', l)\} \\ & = -f(y_1, l) \log\{f(x)\alpha_i^1 + \sum_{x' \neq x} f(x')f(y_1 | x', l)\}. \end{aligned}$$

It is not a constant when we change  $\alpha_i^1$ .

If there are at least two values  $y_1, y_2$  of  $Y$ , such that  $f(y_1, l) > 0, f(y_2, l) > 0$ , then we can change  $\alpha_i^1$  while keeping  $\alpha_i^1 + \alpha_i^2 = d$ , and leave other  $\alpha_i^j$  fixed.

Set  $f(y_1, l) = a_1, f(y_2, l) = a_2, f(x) = c, \sum_{x' \neq x} f(x')f(y_1 | x', l) = b_1, \sum_{x' \neq x} f(x')f(y_2 | x', l) = b_2$ . All these terms are positive. Then in  $-\sum_j f(y_j, l) \log\{f(x)\alpha_i^j + \sum_{x' \neq x} f(x')f(y_j | x', l)\}$ , terms containing  $\alpha_i^1$  and  $\alpha_i^2$  are

$$-a_1 \log(c\alpha_i^1 + b_1) - a_2 \log\{c(d - \alpha_i^1) + b_2\}.$$

Its derivative with respect to  $\alpha_i^1$  is

$$-\frac{a_1 c}{c\alpha_i^1 + b_1} + \frac{a_2 c}{c(d - \alpha_i^1) + b_2}.$$

If the derivative always equal 0 in an interval, then we should have

$$\frac{a_1}{a_2} \equiv \frac{c\alpha_i^1 + b_1}{c(d - \alpha_i^1) + b_2},$$

which is incorrect.

Now we have two groups of  $\{\alpha_i^j\}$  for  $i = 1, 2$  such that

$$g_1 = \lim_{\eta \rightarrow 0} \text{CS}[\mathbf{p}_1^\eta](X \rightarrow Y) < \lim_{\eta \rightarrow 0} \text{CS}[\mathbf{p}_2^\eta](X \rightarrow Y) = g_2.$$

Then for any  $g \in (g_1, g_2)$ , any  $\delta > 0$ , we can find  $\eta < \delta$  small enough such that  $\text{CS}[\mathbf{p}_1^\eta](X \rightarrow Y) < g, \text{CS}[\mathbf{p}_2^\eta](X \rightarrow Y) > g$ . Then we change  $\{\alpha_1^j\}$  continuously to  $\{\alpha_2^j\}$ . During this process CS is always defined, and there exists  $\{\alpha_3\}$  such that  $\text{CS}[\mathbf{p}_3^\eta](X \rightarrow Y) = g$ .

This shows that  $\text{CS}(X \rightarrow Y)$  is essentially ill-defined.

Since  $\text{CS}(X \rightarrow Y)$  and  $\text{PMI}(X, Y | \mathcal{L})$  have the same non-zero terms containing  $f(\cdot | x, l)$ , the same argument shows that  $\text{PMI}(X, Y | \mathcal{L})$  is not well-defined.

**S.4. Proof of Lemma 3 when  $X$  is discrete.** The proofs for discrete and continuous  $X$  are different, therefore we state them separately. Whether  $Y$  is discrete or continuous does not matter, therefore we assume  $Y$  is discrete/continuous when  $X$  is discrete/continuous. We impose some restrictions to simplify the proofs. If  $X$  is discrete, then  $U_X$  is an arbitrary discrete random variable which takes all the values of  $X$  with positive probabilities. If  $X$  is continuous, then  $U_X$  is continuous, and its density function is always positive.

$\text{CMI}(X, Y \mid \mathcal{S}_1) = \sum_{s_1} \text{pr}(\mathcal{S}_1 = s_1) \text{CMI}(X, Y \mid \mathcal{S}_1 = s_1)$ . For a fixed  $s_1$ , assume  $X$  takes values  $1, \dots, r'$ ,  $U_X$  takes values  $1, \dots, r', \dots, r$ , and  $Y$  takes values  $1, \dots, t$  with positive probabilities. Denote  $\text{pr}(X = i, Y = j \mid \mathcal{S}_1 = s_1)$  by  $p_{ij}$ . Define  $p_{-j} = \sum_i p_{ij}$ ,  $p_{i-} = \sum_j p_{ij}$ . With  $\epsilon$ -noise,  $p_{-j}^\epsilon = p_{-j}$ ,  $p_{ij}^\epsilon = (1 - \epsilon)p_{ij} + \epsilon q_i p_{-j}$ ,  $p_{i-}^\epsilon = (1 - \epsilon)p_{i-} + \epsilon q_i$ . Here  $q_i$  is the density of  $U_X$ . Then we have

$$\text{CMI}(X, Y \mid \mathcal{S}_1 = s_1) = \sum_{j=1}^t \sum_{i=1}^{r'} p_{ij} \log \frac{p_{ij}}{p_{i-} p_{-j}},$$

$$\text{CMI}(X^\epsilon, Y \mid \mathcal{S}_1 = s_1) = \sum_{j=1}^t \sum_{i=1}^r \{(1 - \epsilon)p_{ij} + \epsilon q_i p_{-j}\} \log \frac{(1 - \epsilon)p_{ij} + \epsilon q_i p_{-j}}{\{(1 - \epsilon)p_{i-} + \epsilon q_i\} p_{-j}}.$$

$$\begin{aligned} & \text{CMI}(X, Y \mid \mathcal{S}_1 = s_1) - \text{CMI}(X^\epsilon, Y \mid \mathcal{S}_1 = s_1) = \\ & \sum_{j=1}^t \sum_{i=1}^r \left[ (1 - \epsilon + q_i \epsilon) p_{ij} \log \frac{p_{ij}}{p_{i-} p_{-j}} + \sum_{k \neq i} q_i \epsilon p_{kj} \log \frac{p_{kj}}{p_{k-} p_{-j}} \right. \\ & \quad \left. - \{(1 - \epsilon)p_{ij} + \epsilon q_i p_{-j}\} \log \frac{(1 - \epsilon)p_{ij} + \epsilon q_i p_{-j}}{p_{-j} \{(1 - \epsilon)p_{i-} + \epsilon q_i\}} \right]. \end{aligned}$$

If  $p_{k-} = 0$ , namely  $k = r' + 1, \dots, r$ , then we stipulate  $\frac{p_{kj}}{p_{k-} p_{-j}} = 1$ .

For fixed  $i, j$  and  $k = 1, \dots, r$ , set

$$\begin{aligned} a_{ij}^k &= \frac{p_{kj}}{p_{k-} p_{-j}}, \\ b_{ij}^k &= \frac{\epsilon q_i p_{k-}}{(1 - \epsilon)p_{i-} + \epsilon q_i} \quad \text{for } k \neq i, \\ b_{ij}^i &= \frac{(1 - \epsilon + q_i \epsilon)p_{i-}}{(1 - \epsilon)p_{i-} + \epsilon q_i}, \\ c_{ij} &= p_{-j} \{(1 - \epsilon)p_{i-} + \epsilon q_i\}. \end{aligned}$$

Here we know that  $p_{-j} > 0$ ,  $(1 - \epsilon)p_{i-} + \epsilon q_i > 0$ .

Then we have

$$\begin{aligned} & \text{CMI}(X, Y \mid \mathcal{S}_1 = s_1) - \text{CMI}(X^\epsilon, Y \mid \mathcal{S}_1 = s_1) \\ &= \sum_{j=1}^t \sum_{i=1}^r c_{ij} \left\{ \sum_{k=1}^r b_{ij}^k a_{ij}^k \log a_{ij}^k - \left( \sum_{k=1}^r a_{ij}^k b_{ij}^k \right) \log \left( \sum_{k=1}^r a_{ij}^k b_{ij}^k \right) \right\} \geq 0. \end{aligned}$$

The last step is Jensen's inequality, since  $a_{ij}^k \geq 0$ ,  $b_{ij}^k \geq 0$ ,  $\sum_{k=1}^r b_{ij}^k = 1$ ,  $c_{ij} > 0$ ,  $f(x) = x \log x$  is strictly convex down when  $x \geq 0$  (stipulate  $0 \log 0 = 0$ ).

The equality holds if and only if for each  $i, j$ ,  $a_{ij}^1 = a_{ij}^2 = \dots = a_{ij}^{r'}$ , which means  $p_{ij}/p_{i-}$  are equal for all  $i \leq r'$ . Since  $\sum_{i=1}^{r'} p_{i-} (p_{ij}/p_{i-}) = p_{-j}$ ,  $\sum_{i=1}^{r'} p_{i-} = 1$ , we have  $p_{ij}/p_{i-} = p_{-j}$  for each  $i, j$  such that  $p_{i-} > 0$  and  $p_{-j} > 0$ . This is equivalent with that  $X$  and  $Y$  are independent conditioned on  $\mathcal{S}_1 = s_1$ .

$\text{CMI}(X, Y \mid \mathcal{S}_1) = 0$  if and only if  $X$  and  $Y$  are independent conditioned on any possible value of  $\mathcal{S}_1$ . Therefore,  $\text{CMI}(X^\epsilon, Y \mid \mathcal{S}_1) \leq \text{CMI}(X, Y \mid \mathcal{S}_1)$ , and the equality holds if and only if  $\text{CMI}(X, Y \mid \mathcal{S}_1) = 0$ .

### S.5. Proof of Lemma 3 when $X$ is continuous.

$$\text{CMI}(X, Y \mid \mathcal{S}_1) = \int_{-\infty}^{\infty} \text{CMI}(X, Y \mid \mathcal{S}_1 = s_1) h(s_1) ds_1,$$

where  $h(s_1)$  is the probability density function of  $\mathcal{S}_1$ . For a fixed  $s_1$ , denote the joint probability density function of  $X, Y$  conditioned on  $\mathcal{S}_1 = s_1$  by  $p(x, y)$ . Define  $p_1(x) = \int_{-\infty}^{\infty} p(x, y) dy$ ,  $p_2(y) = \int_{-\infty}^{\infty} p(x, y) dx$ . With  $\epsilon$ -noise, the joint probability density function of  $X, Y$  conditioned on  $\mathcal{S}_1 = s_1$  is  $(1 - \epsilon)p(x, y) + \epsilon q(x)p_2(y)$ , where  $q(x)$  is the density function of  $U_X$ . Notice that  $\int_{-\infty}^{\infty} q(x) dx = 1$ ,  $\int_{-\infty}^{\infty} [(1 - \epsilon)p(x, y) + \epsilon q(x)p_2(y)] dx = p_2(y)$ . Then we have

$$\begin{aligned} & \text{CMI}(X, Y \mid \mathcal{S}_1 = s_1) - \text{CMI}(X^\epsilon, Y \mid \mathcal{S}_1 = s_1) \\ &= \int_{-\infty}^{\infty} \int_{-\infty}^{\infty} p(x, y) \log \frac{p(x, y)}{p_1(x)p_2(y)} dx dy \\ &- \int_{-\infty}^{\infty} \int_{-\infty}^{\infty} \{(1 - \epsilon)p(x, y) + \epsilon q(x)p_2(y)\} \log \frac{(1 - \epsilon)p(x, y) + \epsilon q(x)p_2(y)}{\{(1 - \epsilon)p_1(x) + \epsilon q(x)\}p_2(y)} dx dy \\ &= \int_{-\infty}^{\infty} \int_{-\infty}^{\infty} \left[ (1 - \epsilon)p(x, y) \log \frac{p(x, y)}{p_1(x)p_2(y)} \right. \\ &\quad \left. + q(x)\epsilon \left\{ \int_{-\infty}^{\infty} p(x_0, y) \log \frac{p(x_0, y)}{p_1(x_0)p_2(y)} dx_0 \right\} \right. \\ &\quad \left. - \{(1 - \epsilon)p(x, y) + \epsilon q(x)p_2(y)\} \log \frac{(1 - \epsilon)p(x, y) + \epsilon q(x)p_2(y)}{\{(1 - \epsilon)p_1(x) + \epsilon q(x)\}p_2(y)} \right] dx dy. \end{aligned}$$

For fixed  $x, y$ , we can define a probability measure  $\mu_{x,y}(x_0)$  on  $\mathbb{R}$ , which is a mixture of discrete and continuous type measures. For the discrete component, it has probability  $(1 - \epsilon)p_1(x)/\{(1 - \epsilon)p_1(x) + \epsilon q(x)\}$  to take  $x$ . For the continuous component, the probability density function at  $x_0$  is  $q(x)\epsilon p_1(x_0)/\{(1 - \epsilon)p_1(x) + \epsilon q(x)\}$ . Define  $F_{x,y}(x_0) = p(x_0, y)/\{p_1(x_0)p_2(y)\}$ . If  $p_1(x_0) = 0$  or  $p_2(y) = 0$ , stipulate  $F_{x,y}(x_0) = 1$ .

Now we have

$$\begin{aligned} & \text{CMI}(X, Y \mid \mathcal{S}_1 = s_1) - \text{CMI}(X^\epsilon, Y \mid \mathcal{S}_1 = s_1) \\ &= \int_{-\infty}^{\infty} \int_{-\infty}^{\infty} \{(1 - \epsilon)p_1(x) + \epsilon q(x)\}p_2(y) \left[ \int_{-\infty}^{\infty} F_{x,y}(x_0) \log F_{x,y}(x_0) d\mu_{x,y}(x_0) \right. \\ &\quad \left. - \left\{ \int_{-\infty}^{\infty} F_{x,y}(x_0) d\mu_{x,y}(x_0) \right\} \log \left\{ \int_{-\infty}^{\infty} F_{x,y}(x_0) d\mu_{x,y}(x_0) \right\} \right] dx dy \geq 0. \end{aligned}$$

The last step is the probabilistic form of Jensen's inequality, since  $F_{x,y}(x_0)$  is non-negative and integrable with probability measure  $\mu_{x,y}(x_0)$ ,  $\{(1 - \epsilon)p_1(x) + \epsilon q(x)\}p_2(y) > 0$  if  $p_2(y) > 0$ , and  $f(x) = x \log x$  is strictly convex down when  $x \geq 0$  (stipulate  $0 \log 0 = 0$ ).

The equality holds if and only if for  $p_1(x_0) > 0$  and  $p_2(y) > 0$ ,  $F_{x,y}(x_0)$  is a constant with  $x_0$ , which means  $p(x_0, y)/p_1(x_0)$  is a constant almost surely. Since  $\int_{-\infty}^{\infty} p_1(x_0)p(x_0, y)/p_1(x_0)dx_0 = p_2(y)$ ,  $\int_{-\infty}^{\infty} p_1(x_0) = 1$ , we have  $p(x_0, y)/p_1(x_0) = p_2(y)$  for almost surely each  $x_0, y$  such that  $p_1(x_0) > 0$  and  $p_2(y) > 0$ . This is equivalent with that  $X$  and  $Y$  are independent conditioned on  $\mathcal{S}_1 = s_1$ .

$\text{CMI}(X, Y \mid \mathcal{S}_1) = 0$  if and only if  $X$  and  $Y$  are independent conditioned on any possible value of  $\mathcal{S}_1$ , except a zero-measure set. Therefore,  $\text{CMI}(X^\epsilon, Y \mid \mathcal{S}_1) \leq \text{CMI}(X, Y \mid \mathcal{S}_1)$ , and the equality holds if and only if  $\text{CMI}(X, Y \mid \mathcal{S}_1) = 0$ .

**S.6. Proof of Lemma 4.** Set  $\mathcal{S} = \{X, Z_1, \dots, Z_k\}$ . Remember that a Markov boundary  $\mathcal{M}$  is a minimal subset of  $\mathcal{S}$  such that  $\text{MI}(\mathcal{M}, Y) = \text{MI}(\mathcal{S}, Y)$ . Denote  $\mathcal{S}$  with  $\epsilon$ -noise on  $Z_i \notin \mathcal{M}_0$  by  $\mathcal{S}^\epsilon$ . Since  $\text{MI}(\mathcal{M}_0, Y) = \text{MI}(\mathcal{S}, Y)$ ,  $\text{MI}(\mathcal{M}_0, Y) \leq \text{MI}(\mathcal{S}^\epsilon, Y)$ ,  $\text{MI}(\mathcal{S}^\epsilon, Y) \leq \text{MI}(\mathcal{S}, Y)$ , we have  $\text{MI}(\mathcal{S}^\epsilon, Y) = \text{MI}(\mathcal{S}, Y)$ . Therefore,  $\mathcal{M}_0$  is still a Markov boundary after adding  $\epsilon$ -noise. Assume in the new distribution, there is another Markov boundary, then it contains a variable with  $\epsilon$ -noise:  $Z_i^\epsilon$ . Denote this Markov boundary by  $\{Z_i^\epsilon\} \cup \mathcal{S}_1$ . Therefore,  $\text{CMI}(Z_i^\epsilon, Y \mid \mathcal{S}_1) > 0$ . However, from Lemma 3, this implies  $\text{CMI}(Z_i^\epsilon, Y \mid \mathcal{S}_1) < \text{CMI}(Z_i, Y \mid \mathcal{S}_1)$ , namely  $\text{MI}(\{Z_i^\epsilon\} \cup \mathcal{S}_1, Y) < \text{MI}(\{Z_i\} \cup \mathcal{S}_1, Y)$ . But  $\text{MI}(\{Z_i^\epsilon\} \cup \mathcal{S}_1, Y) = \text{MI}(\mathcal{S}^\epsilon, Y) = \text{MI}(\mathcal{S}, Y) \geq \text{MI}(\{Z_i\} \cup \mathcal{S}_1, Y)$ , which is a contradiction.

**S.7. Proof of Lemma 5.** Assume there exists a Markov boundary  $\mathcal{M}$  such that  $W \in \mathcal{E}$ ,  $W \notin \mathcal{M}$ . Then  $\mathcal{S} \setminus \{W\} \supset \mathcal{M}$  is a Markov blanket (Proposition S1), and  $\text{CMI}(Y, \mathcal{S} \mid \mathcal{S} \setminus \{W\}) = 0$ , which contradicts to  $W \in \mathcal{E}$ .

If  $W \notin \mathcal{E}$ , then  $\text{CMI}(Y, \mathcal{S} \mid \mathcal{S} \setminus \{W\}) = 0$ , and  $\mathcal{S} \setminus \{W\}$  is a Markov blanket. This Markov blanket contains a Markov boundary, which does not contain  $W$ .

**S.8. Proof of Theorem 2.** If Markov boundary is unique, then  $\mathcal{E}$  is just the Markov boundary, therefore  $\text{CMI}(Y, \mathcal{S} \mid \mathcal{E}) = 0$ .

If  $\text{CMI}(Y, \mathcal{S} \mid \mathcal{E}) = 0$ , then  $\mathcal{E}$  is a Markov blanket, which means it should contain a Markov boundary. But  $\mathcal{E}$  should be contained in every Markov boundary, therefore  $\mathcal{E}$  itself is a Markov boundary.  $\mathcal{E}$  as a Markov boundary cannot be a proper subset of another Markov boundary, thus the only Markov boundary is  $\mathcal{E}$ .

**S.9. Proof of Proposition 5.** *Proof that Algorithm 1 is sound and complete.* There exists at least one Markov boundary. The algorithm can always terminate in finite steps and produce an output. It is easy to see that the output  $\mathcal{M}_0$  is a Markov blanket. In the last step of Algorithm 1, we have checked that  $X_0 \not\perp\!\!\!\perp Y \mid \mathcal{M}_0 \setminus \{X_0\}$ . For  $X_i \in \mathcal{M}_0$ , since  $\Delta(X_i, Y \mid \mathcal{M}_0 \setminus \{X_i\}) \geq \Delta(X_0, Y \mid \mathcal{M}_0 \setminus \{X_0\})$ , we also have  $X_i \not\perp\!\!\!\perp Y \mid \mathcal{M}_0 \setminus \{X_i\}$ . Therefore the output of Algorithm 1 is a Markov boundary.

*Proof that Algorithm 2 is sound and complete.* The algorithm can always terminate in finite steps and produce an output. Markov boundary  $\mathcal{M}_0$  is

not the unique Markov boundary if and only if there exists variable  $X_i \in \mathcal{M}_0$  which is not essential, namely

$$\text{MI}(Y, \mathcal{S} \setminus \{X_i\}) = \text{MI}(Y, \mathcal{S}).$$

Moreover, since  $\text{MI}(Y, \mathcal{S} \setminus \{X_i\}) = \text{MI}(Y, \mathcal{M}_i)$  and  $\text{MI}(Y, \mathcal{M}_0) = \text{MI}(Y, \mathcal{S})$ , we have

$$\text{MI}(Y, \mathcal{M}_i) = \text{MI}(Y, \mathcal{M}_0),$$

or equivalently,

$$\text{CMI}(Y, \mathcal{M}_0 \mid \mathcal{M}_i) = 0.$$

**S.10. Algorithms references in Remarks 5 and 6.** We now describe Algorithms S1 and S2 that were used in the simulation studies.

Algorithm S1 is obtained by replacing step (3) in Algorithm 2 with a direct test of whether  $X_i$  is an essential variable.

---

**Algorithm S1:** A variant of Algorithm 2 for testing the uniqueness of Markov boundary

---

- (1) **Input**  
Joint distribution of  $\mathcal{S} = \{X_1, \dots, X_k\}$  and  $Y$
  - (2) **Set**  $\mathcal{M}_0 = \{X_1, \dots, X_m\}$  to be the result of Algorithm 1 on  $\mathcal{S}$
  - (3) **For**  $i = 1, \dots, m$ ,  
    - If**  $X_i \perp\!\!\!\perp Y \mid \mathcal{S} \setminus \{X_i\}$   
      - Output**  $Y$  has multiple Markov boundaries
      - Terminate**
  - (4) **Output**  $Y$  has a unique Markov boundary
- 

*Proof of correctness of Algorithm S1.* For a Markov boundary  $\mathcal{M}_0$ , it is the unique Markov boundary if and only if it coincides with  $\mathcal{E}$ . Therefore, we only need to check whether there exists a variable  $X_i \in \mathcal{M}_0$  which is not essential, namely  $X_i \perp\!\!\!\perp Y \mid \mathcal{S} \setminus \{X_i\}$ .

Algorithm S2 is constructed based on Theorem 2 directly.

## REFERENCES

- J. Pearl. *Probabilistic Inference in Intelligent Systems*. Morgan Kaufmann, San Mateo, 1988.

---

**Algorithm S2:** A benchmark algorithm for testing the uniqueness of Markov boundary based on Theorem 2

---

- (1) **Input**  
Joint distribution of  $\mathcal{S} = \{X_1, \dots, X_k\}$  and  $Y$
  - (2) **Set**  $\hat{\mathcal{E}} = \emptyset$
  - (3) **For**  $i = 1, \dots, k$ ,  
     **If**  $X_i \not\perp\!\!\!\perp Y \mid \mathcal{S} \setminus \{X_i\}$   
          $\hat{\mathcal{E}} = \hat{\mathcal{E}} \cup \{X_i\}$
  - (4) **If**  $Y \perp\!\!\!\perp \mathcal{S} \mid \hat{\mathcal{E}}$   
     **Output:**  $Y$  has a unique Markov boundary  
     **Else**  
     **Output:**  $Y$  has multiple Markov boundaries
-
